# Supplementary material
Source: PubMed Central journal article supplement (PMC3859707)

## Supplemental Material for

### Alternative Polyadenylation and miR-34 Family Members Regulate Tau Expression†

John R. Dickson<sup>1</sup>, Carla Kruse<sup>1,2</sup>, Daniel R. Montagna<sup>1</sup>, Bente Finsen<sup>2</sup>, and Michael S. Wolfe<sup>1‡</sup>

<sup>1</sup>Center for Neurologic Diseases, Brigham and Women's Hospital and Harvard Medical School,  
Boston MA 02115, USA

<sup>2</sup>Institute for Molecular Medicine, University of Southern Denmark, Odense, Denmark

**Supplementary Table S1.** Primers for 3'-RACE.

| <i>Purpose</i>                                 | <i>Location</i>         | <i>Orientation</i> | <i>Sequence (5' to 3')</i>                                 |
|------------------------------------------------|-------------------------|--------------------|------------------------------------------------------------|
| 3'-RACE<br>Reverse<br>Transcription<br>Adaptor | Poly(A)<br>Tail         | Reverse            | GCGAGCACAGAATTAATACGACTCACTATAGG-<br>(T) <sub>12</sub> -VN |
| 3'-RACE Outer<br>Primer                        | 3'-RACE<br>Adaptor      | Reverse            | GCTGATGGCGATGAATGAACACTG                                   |
| Short Tau 3'-<br>UTR Primer                    | Tau 3'-UTR<br>112-134   | Forward            | TCGGTTAATTGGTTAATCACTTA                                    |
| Long Tau 3'-<br>UTR Primer                     | Tau 3'-UTR<br>3531-3550 | Forward            | CCACTGACAGGCTTTCCCAG                                       |

**Supplementary Table S2. Primers for Cloning.**

| <i>Construct</i> | <i>Tau 3'-UTR Location</i> | <i>Orientation</i> | <i>Sequence (5' to 3')</i>                             |
|------------------|----------------------------|--------------------|--------------------------------------------------------|
| Tau3UTR_WT       | 1-15                       | Forward            | GCTCGCTAGCCTCGAGTCAGGCCCTGGGGC                         |
| Tau3UTR_WT       | 4451-4465                  | Reverse            | ATGCCTGCAGGTCGACTGGTGCCGGTCTTGC                        |
| Tau3UTR_short    | 1-15                       | Forward            | GCTCGCTAGCCTCGAGTCAGGCCCTGGGGC                         |
| Tau3UTR_short    | 223-256                    | Reverse            | ATGCCTGCAGGTCGACTGAATGTTTTTTTTTAAA<br>TATTTTATTACTAGCC |
| 1-960            | 1-15                       | Forward            | GCTCGCTAGCCTCGAGTCAGGCCCTGGGGC                         |
| 1-960            | 939-960                    | Reverse            | ATGCCTGCAGGTCGACGGCAGCAGTTCCAACCTC<br>AGA              |
| 954-1869         | 954-975                    | Forward            | GCTCGCTAGCCTCGAGTGCTGCCATGATTTTGGC<br>CACT             |
| 954-1869         | 1846-1869                  | Reverse            | ATGCCTGCAGGTCGACTCCAACACTCAACTCAACA<br>GGGTGC          |
| 1845-2793        | 1845-1868                  | Forward            | GCTCGCTAGCCTCGAGTGCACCCTGTTGAGTTGT<br>AGTTGG           |
| 1845-2793        | 2774-2793                  | Reverse            | ATGCCTGCAGGTCGACAGCTGCACACGAAGCTG<br>CCA               |
| 2770-3729        | 2770-2798                  | Forward            | GCTCGCTAGCCTCGAGGGGCTGGCAGCTTCGTGT<br>GC               |
| 2770-3729        | 3709-3729                  | Reverse            | ATGCCTGCAGGTCGACGGAGCCAGTGTGAGAGG<br>TGGC              |
| 3730-4163        | 3730-3747                  | Forward            | GCTCGCTAGCCTCGAGAGACACACAGCCTGTGCT                     |
| 3730-4163        | 4133-4163                  | Reverse            | ATGCCTGCAGGTCGACTAATCAGAGTAATAACTT<br>TATTTCCAAATTC    |
| 954-1136         | 954-975                    | Forward            | ATGCCTGCAGGTCGACTCCAACACTCAACTCAACA<br>GGGTGC          |
| 954-1136         | 1117-1136                  | Reverse            | ATGCCTGCAGGTCGACGCAGTGGCCGTGGGAAG<br>GAC               |
| 1114-1279        | 1114-1133                  | Forward            | GCTCGCTAGCCTCGAGCCTGTCCTTCCCACGGCC<br>AC               |
| 1114-1279        | 1259-1279                  | Reverse            | ATGCCTGCAGGTCGACACCTCCTGCAACCAACCA<br>GGG              |
| 1259-1869        | 1259-1279                  | Forward            | GCTCGCTAGCCTCGAGCCCTGGTTGGTTGCAGGA<br>GG               |
| 1259-1869        | 1846-1869                  | Reverse            | ATGCCTGCAGGTCGACTCCAACACTCAACTCAACA<br>GGGTGC          |
| 2770-3259        | 2770-2798                  | Forward            | GCTCGCTAGCCTCGAGGGGCTGGCAGCTTCGTGT<br>GC               |
| 2770-3259        | 3237-3259                  | Reverse            | ATGCCTGCAGGTCGACCCTATCTAGCCCACCCAA<br>GGACA            |
| 3232-3501        | 3232-3251                  | Forward            | GCTCGCTAGCCTCGAGGCCAGTGTCTTGGGTGG<br>GC                |
| 3232-3501        | 3482-3501                  | Reverse            | ATGCCTGCAGGTCGACCGTGGCTGCTCCCTCCCT<br>CT               |
| 3499-3729        | 3499-3520                  | Forward            | GCTCGCTAGCCTCGAGACGGAGTTAGAGGCCCTT<br>GGGG             |
| 3499-3729        | 3709-3729                  | Reverse            | ATGCCTGCAGGTCGACGGAGCCAGTGTGAGAGG<br>TGGC              |

**Supplementary Table S3.** Primers for Site-Directed Mutagenesis.

| <i>Construct</i> | <i>Orientation</i> | <i>Sequence (5' to 3')</i>                                     |
|------------------|--------------------|----------------------------------------------------------------|
| Tau3UTR_long     | Forward            | TTTCCAAATTGATGGGTGGGCTAGTAATCAAATATTTAAAAAA<br>AAACATTCAAAAACA |
| Tau3UTR_long     | Reverse            | TGTTTTTGAATGTTTTTTTTTAAATATTTGATTACTAGCCCACC<br>CATCAATTTGGAAA |
| 954-1869_mut     | Forward            | GTTGTCTGCCGTGAGAGCCCAATGTGACCCTATACCCCTCATC<br>ACA             |
| 954-1869_mut     | Reverse            | TGTGATGAGGGGTATAGGGTCACATTGGGCTCTCACGGCAGA<br>CAAC             |
| 3730-4163_mut    | Forward            | GTGTATTGTGTGTTTTAACAATGATTTACTCTGACAAGCT<br>GTAAAAGTGAATTTGG   |
| 3730-4163_mut    | Reverse            | CCAAATTCACTTTTACAGCTTGTGAGAGTGTAATCATTGT<br>AAAACACACAATACAC   |

**Supplementary Table S4.** miRNA-Related Oligonucleotides.

| <i>Oligonucleotide</i>         | <i>Sequence (5' to 3')</i>                        |
|--------------------------------|---------------------------------------------------|
| Pre-miR Negative Control #1    | Proprietary (Life Technologies Catalog # AM17110) |
| Pre-miR-34a-5p                 | Proprietary (Life Technologies Catalog # PM11030) |
| Pre-miR-132-3p                 | Proprietary (Life Technologies Catalog # PM10166) |
| Pre-miR-181c-5p                | Proprietary (Life Technologies Catalog # PM10181) |
| Pre-miR-642-5p                 | Proprietary (Life Technologies Catalog # PM11477) |
| miRCURY LNA Negative Control A | GTGTAACACGTCTATACGCCCA                            |
| miRCURY LNA hsa-miR-34a-5p     | ACAACCAGCTAAGACACTGCC                             |
| miRCURY LNA hsa-miR-34b-5p     | AATCAGCTAATGACACTGCCT                             |
| miRCURY LNA hsa-miR-34c-5p     | GCAATCAGCTAACTACACTGCC                            |

**Supplementary Table S5.** Custom Standards for Absolute Quantification qPCR.

| <i>Gene</i> | <i>Sequence</i>                                                                                                                                                                                                                                                                                                                   |
|-------------|-----------------------------------------------------------------------------------------------------------------------------------------------------------------------------------------------------------------------------------------------------------------------------------------------------------------------------------|
| Tau         | GTAAAATCTGAGAAGCTTGACTTCAAGGACAGAGTCCAGTTCGAAGATTGGGTCCC<br>TGGACAATATCACCCACGTCCCTGGCGGAGGAAATAAAAAGATTGAAACCCACA<br>AGCTGACCTTCCGCGAGAACGCCAAAGCCAAGACAGACCACGGGGCGGAGATCG<br>TGTAACAAGTCGCCAGTGGTGTCTGGGGACACGTCTCC                                                                                                            |
| GAPDH       | AGCCCGCAGCCTCCCGCTTCGCTCTCTGCTCCTCCTGTTTCGACAGTCAGCCGCATC<br>TTCTTTTTCGCTCGCCAGCCGAGCCACATCGCTCAGACACCATGGGGAAGGTGAAG<br>GTCGGAGTCAACGGATTTGGTCGATTGGGCGCCTGGTCACCAGGGCTGCTTTTA<br>ACTCTGGTAAAGTGGATATTGTTGCCATCAATGACCCCTTCATTGACCTCAACTAC<br>ATGGTTTACATGTTCCAATATGATTCCACCCATGGCAAATTCCATGGCACCGTCAA<br>GGCTGAGAACGGGAAGCTTGTC |

**Supplementary Table S6.** TaqMan Gene Expression Assay Probes.

| Target                                     | Oligonucleotide Type | Sequence (5' to 3')                                     |
|--------------------------------------------|----------------------|---------------------------------------------------------|
| Firefly luciferase ( <i>luc2</i> )         | Forward Primer       | GCGCAGCTTGCAAGACTATAAG                                  |
|                                            | Reverse Primer       | TTGTCGATGAGAGTGCTCTTAGC                                 |
|                                            | TaqMan Probe         | CTGGTGCCCACTAT                                          |
| <i>Renilla</i> luciferase ( <i>hRluc</i> ) | Forward Primer       | CCTCCTGGATCACTACAAGTACCT                                |
|                                            | Reverse Primer       | GTGGCCCAAAAGATGATTTTCT                                  |
|                                            | TaqMan Probe         | CAGCAGCTCGAACCAA                                        |
| Tau                                        | TaqMan Assay         | Proprietary (Life Technologies Assay ID: Hs00902194_m1) |
| GAPDH                                      | TaqMan Assay         | Proprietary (Life Technologies Assay ID: Hs99999905_m1) |

**Supplementary Figure S1.** Quantification by densitometry of western blot shown in Figure 6A combined with that of a duplicate experiment (n = 3 technical replicates times n = 2 biological replicates).

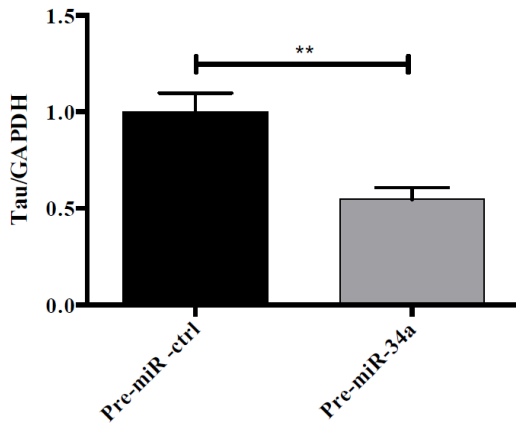

**Supplementary Figure S2.** Quantification by densitometry of western blot from Figure 6B, transfected with Lipofectamine 2000 (A) and that of a similar experiment transfected using RNAiMAX (B). n = 3 technical replicates for each experiment. While neither reached statistical significant, note the trend in both experiments toward increased tau protein levels upon treatment with LNA targeting miR-34a/b/c.

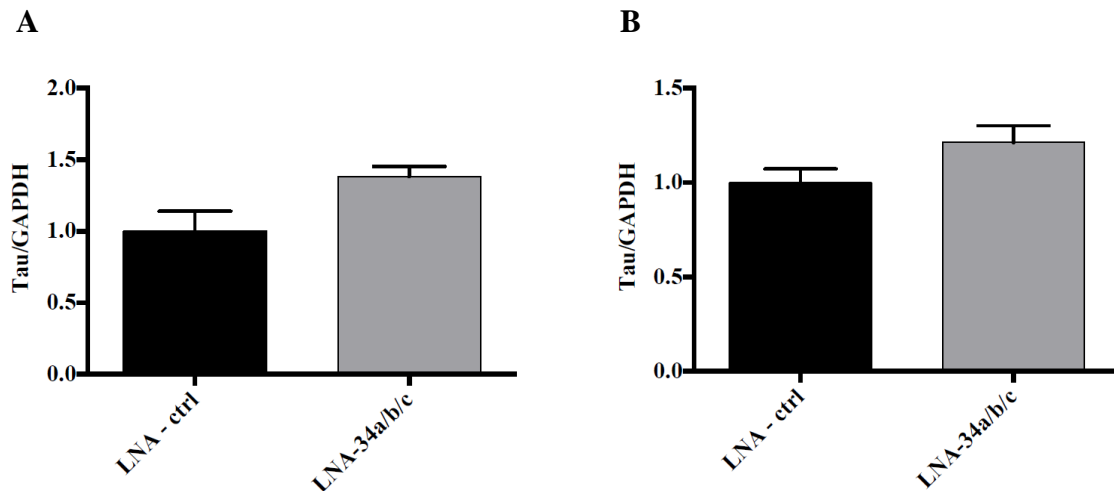

Supplement: NIHMS523440-supplement-Supp_Table_S1-S6___FigS1-S2.pdf [file NIHMS523440-supplement-Supp_Table_S1-S6___FigS1-S2.pdf]
